# Supplementary material for: COVID-19 Vaccination Is Associated with a Better Outcome in Acute Ischemic Stroke Patients: A Retrospective Observational Study
Source: MDPI journal article supplement (doi:10.3390/jcm11236878), 2022-11-22
Supplement: s1 [file s1]

**Supplementary Table S1.** Multivariate Logistic Regression Analysis for Predicting outcome in stroke patients.

|                                      | OR           | Lower 95% CI | Upper 95% CI  | <i>p</i> -Value   |
|--------------------------------------|--------------|--------------|---------------|-------------------|
| Stroke Age > 65 yrs                  | 1.879        | 0.867        | 4.075         | 0.110             |
| Stroke Age > 85 yrs                  | <b>2.374</b> | <b>1.085</b> | <b>5.193</b>  | <b>0.030</b>      |
| NIHSS > 4 at stroke onset            | 1.460        | 0.687        | 3.101         | 0.325             |
| NIHSS > 4 after discharge            | <b>7.524</b> | <b>3.552</b> | <b>15.938</b> | <b>&lt; 0.001</b> |
| Vaccine before stroke                | <b>0.400</b> | <b>0.216</b> | <b>0.741</b>  | <b>0.004</b>      |
| Hypertension                         | 2.313        | 0.839        | 6.378         | 0.105             |
| Obesity                              | 4.647        | 1.016        | 21.253        | 0.059             |
| Previous stroke                      | <b>2.451</b> | <b>1.056</b> | <b>5.689</b>  | <b>0.037</b>      |
| Patent foramen ovale                 | 0.000        | 0.000        |               | 0.999             |
| Hospitalization for COVID-19         | 4.546        | 0.649        | 31.851        | 0.108             |
| Intravenous thrombolysis             | 0.472        | 0.194        | 1.149         | 0.098             |
| Endovascular mechanical thrombectomy | 0.953        | 0.428        | 2.122         | 0.906             |
| Coagulopathy                         | 0.551        | 0.112        | 2.725         | 0.465             |
| COPD                                 | 1.701        | 0.594        | 4.875         | 0.127             |

NIHSS: National Institute of Health Stroke Scale; COPD: Chronic obstructive pulmonary disease.  
Values which resulted statistically significant in the univariate analysis are highlighted in bold character.
